# Supplementary material
Source: PubMed Central journal article supplement (PMC1180763)

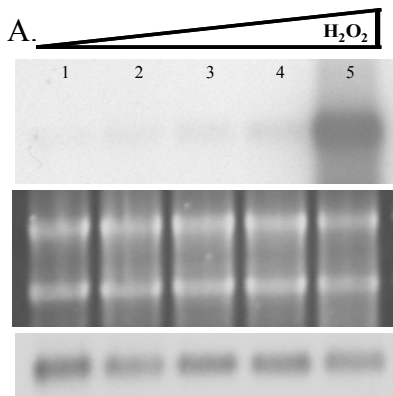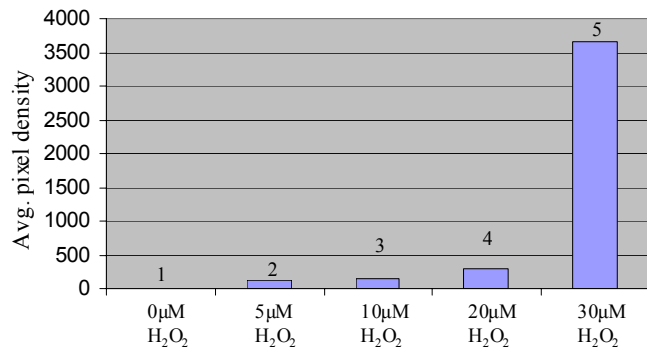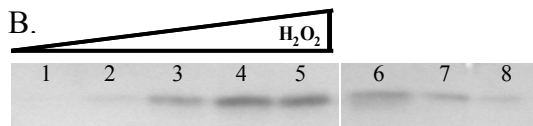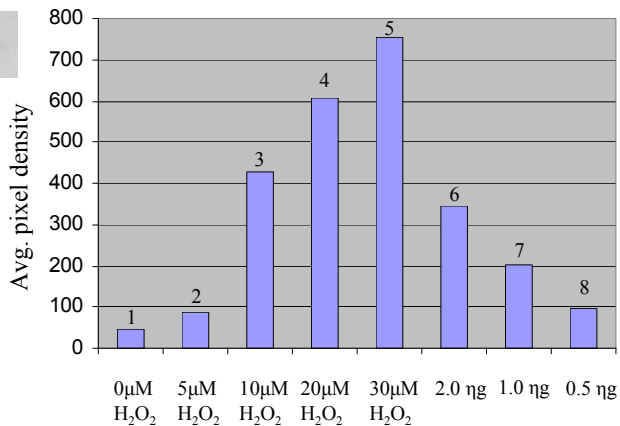

Supplement: pnas_0501497102_1.pdf [file pnas_0501497102_1.pdf]

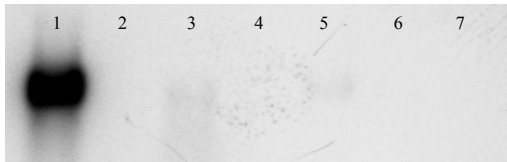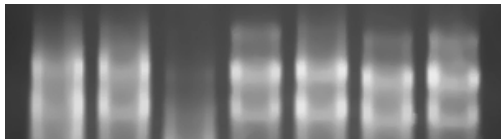

Supplement: pnas_0501497102_2.pdf [file pnas_0501497102_2.pdf]

66 kD

45

36

29

24

20

14.2

6.26

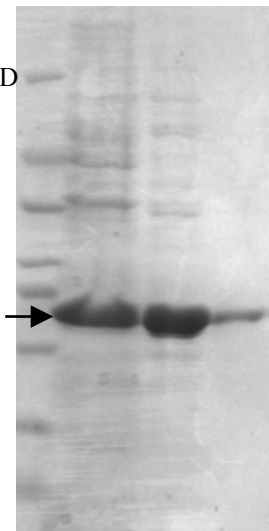

Supplement: pnas_0501497102_3.pdf [file pnas_0501497102_3.pdf]
